# Supplementary material for: Glacier Retreat Results in Loss of Fungal Diversity
Source: MDPI journal article supplement (doi:10.3390/su14031617), 2022-01-29
Supplement: s1 [file s1]

**Table S1—Species names, strain names, sources of isolates, and GenBank accession numbers of the ITS region and D1/Dr2 domain sequences of fungal isolates from Walker Glacier and its foreland.**

| Species                             | Strain    | Isolation source | Sampling site | Accession number |
|-------------------------------------|-----------|------------------|---------------|------------------|
| <i>Comoclathris lini</i>            | G1-1-20-1 | glacier sediment | Site 0        | LC514920         |
| <i>Comoclathris lini</i>            | G1-1-20-2 | glacier sediment | Site 0        | LC514921         |
| <i>Cladosporium cladosporioides</i> | G2-20-1   | glacier sediment | Site 0        | LC514922         |
| <i>Comoclathris lini</i>            | G2-20-2   | glacier sediment | Site 0        | LC514923         |
| <i>Comoclathris lini</i>            | G3-20-1   | glacier sediment | Site 0        | LC514924         |
| <i>Vishniacozyma victoriae</i>      | G3-20-2   | glacier sediment | Site 0        | LC514925         |
| <i>Dioszegia fristingensis</i>      | G3-20-3   | glacier sediment | Site 0        | LC514926         |
| <i>Kriegeriales</i> sp.             | G1-4-1    | glacier sediment | Site 0        | LC514927         |
| <i>Preussia octomera</i>            | G1-4-2    | glacier sediment | Site 0        | LC514928         |
| <i>Kriegeriales</i> sp.             | G1-4-3    | glacier sediment | Site 0        | LC514929         |
| <i>Glaciozyma watsonii</i>          | G1-4-4    | glacier sediment | Site 0        | LC514930         |

|                                    |        |                  |        |          |
|------------------------------------|--------|------------------|--------|----------|
| <i>Kriegeriales</i> sp.            | G2-4-1 | glacier sediment | Site 0 | LC514931 |
| <i>Dothideomycetes</i> sp.         | G2-4-2 | glacier sediment | Site 0 | LC514932 |
| <i>Kriegeriales</i> sp.            | G2-4-3 | glacier sediment | Site 0 | LC514933 |
| <i>Kriegeriales</i> sp.            | G2-4-4 | glacier sediment | Site 0 | LC514934 |
| <i>Kriegeriales</i> sp.            | G2-4-5 | glacier sediment | Site 0 | LC514935 |
| <i>Kriegeriales</i> sp.            | G2-4-6 | glacier sediment | Site 0 | LC514936 |
| <i>Thelebolus microsporus</i>      | G2-4-7 | glacier sediment | Site 0 | LC514937 |
| <i>Kriegeriales</i> sp.            | G3-4-1 | glacier sediment | Site 0 | LC514938 |
| <i>Kriegeriales</i> sp.            | G3-4-2 | glacier sediment | Site 0 | LC514939 |
| <i>Kriegeriales</i> sp.            | G3-4-3 | glacier sediment | Site 0 | LC514940 |
| <i>Kriegeriales</i> sp.            | G3-4-4 | glacier sediment | Site 0 | LC514941 |
| <i>Vishniacozyma ellesmerensis</i> | G3-4-5 | glacier sediment | Site 0 | LC514942 |
| <i>Kriegeriales</i> sp.            | G3-4-6 | glacier sediment | Site 0 | LC514943 |

|                                     |            |                  |        |          |
|-------------------------------------|------------|------------------|--------|----------|
| <i>Kriegeriales</i> sp.             | G3-4-7     | glacier sediment | Site 0 | LC514944 |
| <i>Vishniacozyma ellesmerensis</i>  | G3-4-8     | glacier sediment | Site 0 | LC514945 |
| <i>Ascomycota</i> sp.               | GR1-1-20-1 | glacier sediment | Site 1 | LC514946 |
| <i>Cladosporium cladosporioides</i> | GR1-1-20-2 | glacier sediment | Site 1 | LC514947 |
| <i>Comoclathris lini</i>            | GR1-1-20-3 | glacier sediment | Site 1 | LC514948 |
| <i>Botrytis cinerea</i>             | GR1-2-20-1 | glacier sediment | Site 1 | LC514949 |
| <i>Comoclathris lini</i>            | GR1-2-20-2 | glacier sediment | Site 1 | LC514950 |
| <i>Phoma herbarum</i>               | GR1-2-20-3 | glacier sediment | Site 1 | LC514951 |
| <i>Comoclathris lini</i>            | GR1-3-20-1 | glacier sediment | Site 1 | LC514952 |
| <i>Comoclathris lini</i>            | GR1-3-20-2 | glacier sediment | Site 1 | LC514953 |
| <i>Herpotrichiellaceae</i> sp.      | GR1-3-20-3 | glacier sediment | Site 1 | LC514954 |
| <i>Kriegeriales</i> sp.             | GR1-1-4-5  | glacier sediment | Site 1 | LC514955 |
| <i>Kriegeriales</i> sp.             | GR1-1-4-6  | glacier sediment | Site 1 | LC514956 |

|                                     |            |                  |        |          |
|-------------------------------------|------------|------------------|--------|----------|
| <i>Kriegeriales</i> sp.             | GR1-1-4-7  | glacier sediment | Site 1 | LC514957 |
| <i>Kriegeriales</i> sp.             | GR1-1-4-8  | glacier sediment | Site 1 | LC514958 |
| <i>Kriegeriales</i> sp..            | GR1-2-4-2  | glacier sediment | Site 1 | LC514959 |
| <i>Cladosporium cladosporioides</i> | GR1-2-4-3  | glacier sediment | Site 1 | LC514960 |
| <i>Kriegeriales</i> sp.             | GR1-2-4-4  | glacier sediment | Site 1 | LC514961 |
| <i>Kriegeriales</i> sp..            | GR1-2-4-5  | glacier sediment | Site 1 | LC514962 |
| <i>Kriegeriales</i> sp..            | GR1-2-4-6  | glacier sediment | Site 1 | LC514963 |
| <i>Kriegeriales</i> sp..            | GR1-2-4-7  | glacier sediment | Site 1 | LC514964 |
| <i>Kriegeriales</i> sp.             | GR1-2-4-8  | glacier sediment | Site 1 | LC514965 |
| <i>Kriegeriales</i> sp.             | GR1-2-4-9  | glacier sediment | Site 1 | LC514966 |
| <i>Kriegeriales</i> sp.             | GR1-3-4-2  | glacier sediment | Site 1 | LC514967 |
| <i>Pseudogymnoascus pannorum</i>    | GR1-3-4-3  | glacier sediment | Site 1 | LC514968 |
| <hr/>                               |            |                  |        |          |
| <i>Mucor hiemalis</i>               | GR2-1-20-1 | Sediment         | Site 2 | LC514969 |

|                                |            |          |        |          |
|--------------------------------|------------|----------|--------|----------|
| <i>Mucor hiemalis</i>          | GR2-1-20-2 | Sediment | Site 2 | LC514970 |
| <i>Mucor hiemalis</i>          | GR2-2-20-1 | Sediment | Site 2 | LC514971 |
| <i>Mucor hiemalis</i>          | GR2-2-20-2 | Sediment | Site 2 | LC514972 |
| <i>Dioszegia fristingensis</i> | GR2-3-20-3 | Sediment | Site 2 | LC514973 |
| <i>Mucor hiemalis</i>          | GR2-3-20-4 | Sediment | Site 2 | LC514974 |
| <i>Dioszegia fristingensis</i> | GR2-3-20-8 | Sediment | Site 2 | LC514975 |
| <i>Mucor hiemalis</i>          | GR2-1-4-1  | Sediment | Site 2 | LC514976 |
| <i>Mucor hiemalis</i>          | GR2-1-4-2  | Sediment | Site 2 | LC514977 |
| <i>Dioszegia fristingensis</i> | GR2-2-4-1  | Sediment | Site 2 | LC514978 |
| <i>Mrakia roberti</i>          | GR2-2-4-2  | Sediment | Site 2 | LC514979 |
| <i>Mrakia roberti</i>          | GR2-2-4-3  | Sediment | Site 2 | LC514980 |
| <i>Dioszegia fristingensis</i> | GR2-2-4-4  | Sediment | Site 2 | LC514981 |
| <i>Mucor hiemalis</i>          | GR2-2-4-5  | Sediment | Site 2 | LC514982 |

|                                 |            |          |        |          |
|---------------------------------|------------|----------|--------|----------|
| <i>Mrakia roberti</i>           | GR2-2-4-7  | Sediment | Site 2 | LC514983 |
| <i>Mrakia roberti</i>           | GR2-2-4-8  | Sediment | Site 2 | LC514984 |
| <i>Mrakia roberti</i>           | GR2-2-4-9  | Sediment | Site 2 | LC514985 |
| <i>Dioszegia frisingensis</i>   | GR2-2-4-10 | Sediment | Site 2 | LC514986 |
| <i>Mrakia arctica</i>           | GR2-3-4-1  | Sediment | Site 2 | LC514987 |
| <i>Dioszegia frisingensis</i>   | GR2-3-4-2  | Sediment | Site 2 | LC514988 |
| <i>Mrakia arctica</i>           | GR2-3-4-3  | Sediment | Site 2 | LC514989 |
| <i>Dioszegia fristingensis</i>  | GR2-3-4-4  | Sediment | Site 2 | LC514990 |
| <i>Mrakia arctica</i>           | GR2-3-4-5  | Sediment | Site 2 | LC514991 |
| <i>Mrakia arctica</i>           | GR2-3-4-6  | Sediment | Site 2 | LC514992 |
| <i>Mrakia arctica</i>           | GR2-3-4-7  | Sediment | Site 2 | LC514993 |
| <i>Mrakia arctica</i>           | GR2-3-4-8  | Sediment | Site 2 | LC514994 |
| <hr/>                           |            |          |        |          |
| <i>Leucosporidium fragarium</i> | GR3-1-20-1 | Sediment | Site 3 | LC514995 |

|                                 |            |          |        |          |
|---------------------------------|------------|----------|--------|----------|
| <i>Vishniacozyma victoriae</i>  | GR3-1-20-2 | Sediment | Site 3 | LC514996 |
| <i>Phoma herbarum</i>           | GR3-1-20-3 | Sediment | Site 3 | LC514997 |
| <i>Mortierella antarctica</i>   | GR3-2-30-1 | Sediment | Site 3 | LC514998 |
| <i>Vishniacozyma victoriae</i>  | GR3-2-30-2 | Sediment | Site 3 | LC514999 |
| <i>Vishniacozyma victoriae</i>  | GR3-2-30-3 | Sediment | Site 3 | LC515000 |
| <i>Dioszegia fristingensis</i>  | GR3-2-30-4 | Sediment | Site 3 | LC515001 |
| <i>Vishniacozyma victoriae</i>  | GR3-2-30-5 | Sediment | Site 3 | LC515002 |
| <i>Phoma herbarum</i>           | GR3-2-30-6 | Sediment | Site 3 | LC515003 |
| <i>Vishniacozyma victoriae</i>  | GR3-2-30-7 | Sediment | Site 3 | LC515004 |
| <i>Thelebolus microcarpus</i>   | GR3-3-20-2 | Sediment | Site 3 | LC515005 |
| <i>Thelebolus microcarpus</i>   | GR3-3-20-4 | Sediment | Site 3 | LC515006 |
| <i>Thelebolus microcarpus</i>   | GR3-3-20-5 | Sediment | Site 3 | LC515007 |
| <i>Leucosporidium fragarium</i> | GR3-3-20-6 | Sediment | Site 3 | LC515008 |

|                                |            |          |        |          |
|--------------------------------|------------|----------|--------|----------|
| <i>Vishniacozyma victoriae</i> | GR3-3-20-7 | Sediment | Site 3 | LC515009 |
| <i>Dioszegia fristingensis</i> | GR3-1-4-4  | Sediment | Site 3 | LC515010 |
| <i>Vishniacozyma victoriae</i> | GR3-1-4-5  | Sediment | Site 3 | LC515011 |
| <i>Vishniacozyma victoriae</i> | GR3-1-4-6  | Sediment | Site 3 | LC515012 |
| <i>Vishniacozyma victoriae</i> | GR3-1-4-8  | Sediment | Site 3 | LC515013 |
| <i>Vishniacozyma victoriae</i> | GR3-2-4-1  | Sediment | Site 3 | LC515014 |
| <i>Dioszegia fristingensis</i> | GR3-2-4-2  | Sediment | Site 3 | LC515015 |
| <i>Mrakia roberti</i>          | GR3-2-4-3  | Sediment | Site 3 | LC515016 |
| <i>Dioszegia fristingensis</i> | GR3-2-4-4  | Sediment | Site 3 | LC515017 |
| <i>Mrakia hoshinonis</i>       | GR3-2-4-5  | Sediment | Site 3 | LC515018 |
| <i>Vishniacozyma victoriae</i> | GR3-2-4-6  | Sediment | Site 3 | LC515019 |
| <i>Dioszegia fristingensis</i> | GR3-2-4-7  | Sediment | Site 3 | LC515020 |
| <i>Mortierella antarctica</i>  | GR3-2-4-8  | Sediment | Site 3 | LC515021 |



|                                  |            |          |        |          |
|----------------------------------|------------|----------|--------|----------|
| <i>Vishniacozyma victoriae</i>   | GR3-3-4-1  | Sediment | Site 3 | LC515022 |
| <i>Mrakia roberti</i>            | GR3-3-4-2  | Sediment | Site 3 | LC513023 |
| <i>Mrakiahoshinonis</i>          | GR3-3-4-3  | Sediment | Site 3 | LC515024 |
| <i>Vishniacozyma victoriae</i>   | GR3-3-4-4  | Sediment | Site 3 | LC515025 |
| <i>Holtermanniella festucosa</i> | GR3-3-4-5  | Sediment | Site 3 | LC515026 |
| <i>Mrakia hoshinonis</i>         | GR3-3-4-6  | Sediment | Site 3 | LC515027 |
| <i>Vishniacozyma victoriae</i>   | GR3-3-4-7  | Sediment | Site 3 | LC515028 |
| <i>Vishniacozyma victoriae</i>   | GR3-3-4-8  | Sediment | Site 3 | LC515029 |
| <hr/>                            |            |          |        |          |
| <i>Vishniacozyma victoriae</i>   | GR4-1-20-2 | Sediment | Site 4 | LC515030 |
| <i>Filobasidium globisporum</i>  | GR4-1-20-3 | Sediment | Site 4 | LC515031 |
| <i>Filobasidium globisporum</i>  | GR4-1-20-4 | Sediment | Site 4 | LC515032 |
| <i>Mortierella</i> sp.           | GR4-1-20-5 | Sediment | Site 4 | LC515033 |
| <i>Mortierella alpina</i>        | GR4-2-20-1 | Sediment | Site 4 | LC515034 |

|                                |            |          |        |          |
|--------------------------------|------------|----------|--------|----------|
| <i>Mortierella alpina</i>      | GR4-2-20-2 | Sediment | Site 4 | LC515035 |
| <i>Mucor hiemalis</i>          | GR4-2-20-3 | Sediment | Site 4 | LC515036 |
| <i>Vishniacozyma victoriae</i> | GR4-2-20-4 | Sediment | Site 4 | LC515037 |
| <i>Vishniacozyma victoriae</i> | GR4-2-20-5 | Sediment | Site 4 | LC515038 |
| <i>Phoma herbarum</i>          | GR4-3-20-1 | Sediment | Site 4 | LC515039 |
| <i>Mortierella antarctica</i>  | GR4-3-20-2 | Sediment | Site 4 | LC515040 |
| <i>Mrakia gelida</i>           | GR4-1-4-1  | Sediment | Site 4 | LC515041 |
| <i>Mrakia hoshinonis</i>       | GR4-1-4-2  | Sediment | Site 4 | LC515042 |
| <i>Mrakia hoshinonis</i>       | GR4-1-4-3  | Sediment | Site 4 | LC515043 |
| <i>Mrakia arctica</i>          | GR4-1-4-4  | Sediment | Site 4 | LC515044 |
| <i>Mrakia gelida</i>           | GR4-1-4-5  | Sediment | Site 4 | LC515045 |
| <i>Mrakia gelida</i>           | GR4-1-4-6  | Sediment | Site 4 | LC515046 |
| <i>Mrakia hoshinonis</i>       | GR4-1-4-7  | Sediment | Site 4 | LC515047 |

|                                |           |          |        |          |
|--------------------------------|-----------|----------|--------|----------|
| <i>Vishniacozyma victoriae</i> | GR4-2-4-1 | Sediment | Site 4 | LC515048 |
| <i>Mrakia hoshinonis</i>       | GR4-2-4-2 | Sediment | Site 4 | LC515049 |
| <i>Mrakia gelida</i>           | GR4-2-4-3 | Sediment | Site 4 | LC515050 |
| <i>Mrakia hoshinonis</i>       | GR4-2-4-4 | Sediment | Site 4 | LC515051 |
| <i>Mrakia gelida</i>           | GR4-2-4-5 | Sediment | Site 4 | LC515052 |
| <i>Mucor hiemalis</i>          | GR4-2-4-6 | Sediment | Site 4 | LC515053 |
| <i>Mrakia gelida</i>           | GR4-2-4-7 | Sediment | Site 4 | LC515054 |
| <i>Mrakia gelida</i>           | GR4-3-4-1 | Sediment | Site 4 | LC515055 |
| <i>Mrakia hoshinonis</i>       | GR4-3-4-2 | Sediment | Site 4 | LC515056 |
| <i>Mrakia gelida</i>           | GR4-3-4-3 | Sediment | Site 4 | LC515057 |
| <i>Vishniacozyma victoriae</i> | GR4-3-4-4 | Sediment | Site 4 | LC515058 |
| <i>Mrakia gelida</i>           | GR4-3-4-5 | Sediment | Site 4 | LC515059 |
| <i>Dioszegia fristingensis</i> | GR4-3-4-6 | Sediment | Site 4 | LC515060 |

|                                |            |          |        |          |
|--------------------------------|------------|----------|--------|----------|
| <i>Mrakia gelida</i>           | GR4-3-4-7  | Sediment | Site 4 | LC515061 |
| <i>Vishniacozyma victoriae</i> | GR5-1-20-1 | Sediment | Site 5 | LC515062 |
| <i>Vishniacozyma victoriae</i> | GR5-1-20-3 | Sediment | Site 5 | LC515063 |
| <i>Vishniacozyma victoriae</i> | GR5-1-20-4 | Sediment | Site 5 | LC515064 |
| <i>Vishniacozyma victoriae</i> | GR5-1-20-6 | Sediment | Site 5 | LC515065 |
| <i>Mortierella alpina</i>      | GR5-2-20-1 | Sediment | Site 5 | LC515066 |
| <i>Mucor hiemalis</i>          | GR5-2-20-2 | Sediment | Site 5 | LC515067 |
| <i>Vishniacozyma victoriae</i> | GR5-2-20-4 | Sediment | Site 5 | LC515068 |
| <i>Vishniacozyma victoriae</i> | GR5-2-20-5 | Sediment | Site 5 | LC515069 |
| <i>Vishniacozyma victoriae</i> | GR5-3-20-1 | Sediment | Site 5 | LC515070 |
| <i>Phoma herbarum</i>          | GR5-3-20-2 | Sediment | Site 5 | LC515071 |
| <i>Vishniacozyma victoriae</i> | GR5-3-20-3 | Sediment | Site 5 | LC515072 |
| <i>Vishniacozyma victoriae</i> | GR5-3-20-4 | Sediment | Site 5 | LC515073 |

|                                |            |          |        |          |
|--------------------------------|------------|----------|--------|----------|
| <i>Mucor hiemalis</i>          | GR5-3-20-5 | Sediment | Site 5 | LC515074 |
| <i>Vishniacozyma victoriae</i> | GR5-3-20-6 | Sediment | Site 5 | LC515075 |
| <i>Mrakia gelida</i>           | GR5-1-4-1  | Sediment | Site 5 | LC515076 |
| <i>Vishniacozyma victoriae</i> | GR5-1-4-2  | Sediment | Site 5 | LC515077 |
| <i>Mrakia gelida</i>           | GR5-1-4-3  | Sediment | Site 5 | LC515078 |
| <i>Vishniacozyma victoriae</i> | GR5-1-4-4  | Sediment | Site 5 | LC515079 |
| <i>Mrakia gelida</i>           | GR5-1-4-5  | Sediment | Site 5 | LC515080 |
| <i>Mrakia gelida</i>           | GR5-1-4-6  | Sediment | Site 5 | LC515081 |
| <i>Vishniacozyma victoriae</i> | GR5-1-4-7  | Sediment | Site 5 | LC515082 |
| <i>Mrakia gelida</i>           | GR5-2-4-1  | Sediment | Site 5 | LC515083 |
| <i>Mrakia gelida</i>           | GR5-2-4-2  | Sediment | Site 5 | LC515084 |
| <i>Mrakia hoshinonis</i>       | GR5-2-4-3  | Sediment | Site 5 | LC515085 |
| <i>Mrakia hoshinonis</i>       | GR5-2-4-4  | Sediment | Site 5 | LC515086 |

|                                     |            |          |        |          |
|-------------------------------------|------------|----------|--------|----------|
| <i>Dioszegia fristingensis</i>      | GR5-2-4-5  | Sediment | Site 5 | LC515087 |
| <i>Mrakia gelida</i>                | GR5-2-4-6  | Sediment | Site 5 | LC515088 |
| <i>Mrakia hoshinonis</i>            | GR5-3-4-2  | Sediment | Site 5 | LC515089 |
| <i>Mrakia gelida</i>                | GR5-3-4-3  | Sediment | Site 5 | LC515090 |
| <i>Mrakia hoshinonis</i>            | GR5-3-4-5  | Sediment | Site 5 | LC515091 |
| <i>Mrakia gelida</i>                | GR5-3-4-6  | Sediment | Site 5 | LC515092 |
| <i>Vishniacozyma victoriae</i>      | GR5-3-4-7  | Sediment | Site 5 | LC515093 |
| <i>Mrakia hoshinonis</i>            | GR5-3-4-8  | Sediment | Site 5 | LC515094 |
| <i>Mrakia hoshinonis</i>            | GR5-3-4-9  | Sediment | Site 5 | LC515095 |
| <i>Cladosporium cladosporioides</i> | GR5-3-4-10 | Sediment | Site 5 | LC515096 |
| <i>Vishniacozyma victoriae</i>      | GR6-1-20-1 | Sediment | Site 6 | LC515097 |
| <i>Cladosporium cladosporioides</i> | GR6-1-20-2 | Sediment | Site 6 | LC515098 |
| <i>Mucor hiemalis</i>               | GR6-1-20-3 | Sediment | Site 6 | LC515099 |

|                                     |            |          |        |          |
|-------------------------------------|------------|----------|--------|----------|
| <i>Vishniacozyma tephrensis</i>     | GR6-1-20-4 | Sediment | Site 6 | LC515100 |
| <i>Vishniacozyma victoriae</i>      | GR6-1-20-5 | Sediment | Site 6 | LC515101 |
| <i>Vishniacozyma victoriae</i>      | GR6-1-20-6 | Sediment | Site 6 | LC515102 |
| <i>Cladosporium cladosporioides</i> | GR6-2-20-1 | Sediment | Site 6 | LC515103 |
| <i>Vishniacozyma victoriae</i>      | GR6-2-20-2 | Sediment | Site 6 | LC515104 |
| <i>Vishniacozyma victoriae</i>      | GR6-2-20-5 | Sediment | Site 6 | LC515105 |
| <i>Vishniacozyma victoriae</i>      | GR6-2-20-7 | Sediment | Site 6 | LC515106 |
| <i>Mortierella amoeboides</i>       | GR6-3-20-1 | Sediment | Site 6 | LC515107 |
| <i>Cladosporium cladosporioides</i> | GR6-3-20-2 | Sediment | Site 6 | LC515108 |
| <i>Vishniacozyma victoriae</i>      | GR6-3-20-3 | Sediment | Site 6 | LC515109 |
| <i>Vishniacozyma victoriae</i>      | GR6-3-20-4 | Sediment | Site 6 | LC515110 |
| <i>Vishniacozyma victoriae</i>      | GR6-3-20-6 | Sediment | Site 6 | LC515111 |
| <i>Vishniacozyma victoriae</i>      | GR6-3-20-7 | Sediment | Site 6 | LC515112 |

|                                |           |          |        |          |
|--------------------------------|-----------|----------|--------|----------|
| <i>Mrakia gelida</i>           | GR6-1-4-1 | Sediment | Site 6 | LC515113 |
| <i>Vishniacozyma victoriae</i> | GR6-1-4-2 | Sediment | Site 6 | LC515114 |
| <i>Mrakia hoshinonis</i>       | GR6-1-4-3 | Sediment | Site 6 | LC515115 |
| <i>Mrakia hoshinonis</i>       | GR6-1-4-5 | Sediment | Site 6 | LC515116 |
| <i>Mrakia gelida</i>           | GR6-1-4-6 | Sediment | Site 6 | LC515117 |
| <i>Mrakia gelida</i>           | GR6-1-4-7 | Sediment | Site 6 | LC515118 |
| <i>Mrakia gelida</i>           | GR6-2-4-1 | Sediment | Site 6 | LC515119 |
| <i>Mrakia gelida</i>           | GR6-2-4-2 | Sediment | Site 6 | LC515120 |
| <i>Mrakia gelida</i>           | GR6-2-4-3 | Sediment | Site 6 | LC515121 |
| <i>Mrakia gelida</i>           | GR6-2-4-4 | Sediment | Site 6 | LC515122 |
| <i>Mrakia gelida</i>           | GR6-2-4-5 | Sediment | Site 6 | LC515123 |
| <i>Mrakia gelida</i>           | GR6-2-4-6 | Sediment | Site 6 | LC515124 |
| <i>Mrakia hoshinonis</i>       | GR6-2-4-7 | Sediment | Site 6 | LC515125 |



|                                |            |          |        |          |
|--------------------------------|------------|----------|--------|----------|
| <i>Mrakia gelida</i>           | GR6-3-4-1  | Sediment | Site 6 | LC515126 |
| <i>Vishniacozyma victoriae</i> | GR6-3-4-2  | Sediment | Site 6 | LC515127 |
| <i>Vishniacozyma victoriae</i> | GR6-3-4-3  | Sediment | Site 6 | LC515128 |
| <i>Mrakia hoshinonis</i>       | GR6-3-4-4  | Sediment | Site 6 | LC515129 |
| <i>Mrakia hoshinonis</i>       | GR6-3-4-5  | Sediment | Site 6 | LC515130 |
| <i>Mrakia gelida</i>           | GR6-3-4-6  | Sediment | Site 6 | LC515131 |
| <i>Vishniacozyma victoriae</i> | GR6-3-4-7  | Sediment | Site 6 | LC515132 |
| <i>Mrakia gelida</i>           | GR6-3-4-8  | Sediment | Site 6 | LC515133 |
| <hr/>                          |            |          |        |          |
| <i>Mortierella alpina</i>      | GR7-1-20-1 | Sediment | Site 7 | LC515134 |
| <i>Mortierella alpina</i>      | GR7-2-20-1 | Sediment | Site 7 | LC515135 |
| <i>Mortierella alpina</i>      | GR7-2-20-2 | Sediment | Site 7 | LC515136 |
| <i>Mortierella antarctica</i>  | GR7-3-20-1 | Sediment | Site 7 | LC515137 |
| <i>Mrakia gelida</i>           | GR7-3-20-3 | Sediment | Site 7 | LC515138 |

|                       |           |          |        |          |
|-----------------------|-----------|----------|--------|----------|
| <i>Mrakia gelida</i>  | GR7-1-4-1 | Sediment | Site 7 | LC515139 |
| <i>Mrakia gelida</i>  | GR7-1-4-2 | Sediment | Site 7 | LC515140 |
| <i>Mrakia arctica</i> | GR7-1-4-3 | Sediment | Site 7 | LC515141 |
| <i>Mrakia gelida</i>  | GR7-1-4-4 | Sediment | Site 7 | LC515142 |
| <i>Mrakia gelida</i>  | GR7-1-4-5 | Sediment | Site 7 | LC515143 |
| <i>Mrakia gelida</i>  | GR7-1-4-6 | Sediment | Site 7 | LC515144 |
| <i>Mrakia gelida</i>  | GR7-1-4-7 | Sediment | Site 7 | LC515145 |
| <i>Mrakia gelida</i>  | GR7-2-4-1 | Sediment | Site 7 | LC515146 |
| <i>Mrakia gelida</i>  | GR7-2-4-2 | Sediment | Site 7 | LC515147 |
| <i>Mrakia gelida</i>  | GR7-2-4-3 | Sediment | Site 7 | LC515148 |
| <i>Mrakia gelida</i>  | GR7-2-4-4 | Sediment | Site 7 | LC515149 |
| <i>Mrakia gelida</i>  | GR7-2-4-5 | Sediment | Site 7 | LC515150 |
| <i>Mrakia gelida</i>  | GR7-2-4-6 | Sediment | Site 7 | LC515151 |

|                                |            |          |        |          |
|--------------------------------|------------|----------|--------|----------|
| <i>Mrakia gelida</i>           | GR7-2-4-7  | Sediment | Site 7 | LC515152 |
| <i>Mrakia gelida</i>           | GR7-3-4-1  | Sediment | Site 7 | LC515153 |
| <i>Mrakia gelida</i>           | GR7-3-4-2  | Sediment | Site 7 | LC515154 |
| <i>Mrakia gelida</i>           | GR7-3-4-3  | Sediment | Site 7 | LC515155 |
| <i>Mrakia gelida</i>           | GR7-3-4-4  | Sediment | Site 7 | LC515156 |
| <i>Mrakia gelida</i>           | GR7-3-4-5  | Sediment | Site 7 | LC515157 |
| <i>Mrakia gelida</i>           | GR7-3-4-6  | Sediment | Site 7 | LC515158 |
| <hr/>                          |            |          |        |          |
| <i>Mortierella clonocystis</i> | GR8-1-20-1 | Sediment | Site 8 | LC515159 |
| <i>Mucor hiemalis</i>          | GR8-1-20-2 | Sediment | Site 8 | LC515160 |
| <i>Mortierella clonocystis</i> | GR8-1-20-3 | Sediment | Site 8 | LC515161 |
| <i>Mucor hiemalis</i>          | GR8-2-20-1 | Sediment | Site 8 | LC515162 |
| <i>Mucor hiemalis</i>          | GR8-2-20-2 | Sediment | Site 8 | LC515163 |
| <i>Mortierella alpina</i>      | GR8-3-20-1 | Sediment | Site 8 | LC515164 |

|                                |            |          |        |          |
|--------------------------------|------------|----------|--------|----------|
| <i>Mucor hiemalis</i>          | GR8-3-20-2 | Sediment | Site 8 | LC515165 |
| <i>Mrakia hoshinonis</i>       | GR8-1-4-1  | Sediment | Site 8 | LC515166 |
| <i>Mrakia gelida</i>           | GR8-1-4-2  | Sediment | Site 8 | LC515167 |
| <i>Mrakia hoshinonis</i>       | GR8-1-4-3  | Sediment | Site 8 | LC515168 |
| <i>Mrakia gelida</i>           | GR8-1-4-4  | Sediment | Site 8 | LC515169 |
| <i>Mrakia gelida</i>           | GR8-1-4-5  | Sediment | Site 8 | LC515170 |
| <i>Mrakia hoshinonis</i>       | GR8-1-4-6  | Sediment | Site 8 | LC515171 |
| <i>Mrakia gelida</i>           | GR8-1-4-7  | Sediment | Site 8 | LC515172 |
| <i>Mrakia hoshinonis</i>       | GR8-1-4-8  | Sediment | Site 8 | LC515173 |
| <i>Mortierella clonocystis</i> | GR8-1-4-9  | Sediment | Site 8 | LC515174 |
| <i>Mrakia hoshinonis</i>       | GR8-1-4-10 | Sediment | Site 8 | LC515175 |
| <i>Mrakia hoshinonis</i>       | GR8-2-4-1  | Sediment | Site 8 | LC515176 |
| <i>Mrakia gelida</i>           | GR8-2-4-2  | Sediment | Site 8 | LC515177 |

|                                |            |          |        |          |
|--------------------------------|------------|----------|--------|----------|
| <i>Mrakia hoshinonis</i>       | GR8-2-4-3  | Sediment | Site 8 | LC515178 |
| <i>Mrakia hoshinonis</i>       | GR8-2-4-4  | Sediment | Site 8 | LC515179 |
| <i>Mrakia hoshinonis</i>       | GR8-2-4-5  | Sediment | Site 8 | LC515180 |
| <i>Mrakia gelida</i>           | GR8-2-4-6  | Sediment | Site 8 | LC515181 |
| <i>Mrakia gelida</i>           | GR8-2-4-7  | Sediment | Site 8 | LC515182 |
| <i>Mrakia hoshinonis</i>       | GR8-2-4-8  | Sediment | Site 8 | LC515183 |
| <i>Mortierella clonocystis</i> | GR8-2-4-9  | Sediment | Site 8 | LC515184 |
| <i>Mrakia hoshinonis</i>       | GR8-2-4-10 | Sediment | Site 8 | LC515185 |
| <i>Mrakia hoshinonis</i>       | GR8-3-4-1  | Sediment | Site 8 | LC515186 |
| <i>Mrakia gelida</i>           | GR8-3-4-2  | Sediment | Site 8 | LC515187 |
| <i>Mrakia gelida</i>           | GR8-3-4-3  | Sediment | Site 8 | LC515188 |
| <i>Mrakia gelida</i>           | GR8-3-4-4  | Sediment | Site 8 | LC515189 |
| <i>Mrakia gelida</i>           | GR8-3-4-5  | Sediment | Site 8 | LC515190 |

|                      |           |          |        |          |
|----------------------|-----------|----------|--------|----------|
| <i>Mrakia gelida</i> | GR8-3-4-6 | Sediment | Site 8 | LC515191 |
|----------------------|-----------|----------|--------|----------|

|                      |           |          |        |          |
|----------------------|-----------|----------|--------|----------|
| <i>Mrakia gelida</i> | GR8-3-4-7 | Sediment | Site 8 | LC515192 |
|----------------------|-----------|----------|--------|----------|

---

**Table S2. The number of strains isolated from each sampling site.**

| No. of strains                      | On glacier | Glacier<br>foreland |
|-------------------------------------|------------|---------------------|
| <b>Zygomycetes</b>                  |            |                     |
| <i>Mortierella</i> sp.              | 0          | 1                   |
| <i>Mortierella alpina</i>           | 0          | 7                   |
| <i>Mortierella antarctica</i>       | 0          | 4                   |
| <i>Mortierella amoeboides</i>       | 0          | 1                   |
| <i>Mortierella clonocystis</i>      | 0          | 4                   |
| <i>Mucor hiemalis</i>               | 0          | 17                  |
| <b>Ascomycetes</b>                  |            |                     |
| <i>Ascomycota</i> sp.               | 1          | 0                   |
| <i>Botrytis cinerea</i>             | 1          | 0                   |
| <i>Cladosporium cladosporioides</i> | 3          | 4                   |
| <i>Comoclathris lini</i>            | 8          | 0                   |
| <i>Dothideomycetes</i> sp.          | 1          | 0                   |
| <i>Herpotrichiellaceae</i> sp.      | 1          | 0                   |
| <i>Phoma herbarum</i>               | 1          | 4                   |
| <i>Preussia octomera</i>            | 1          | 0                   |
| <i>Pseudogymnoascus pannorum</i>    | 1          | 0                   |
| <i>Thelebolus microcarpus</i>       | 1          | 3                   |

---

**Basidiomycetes**

*Dioszegia fristingensis* 1 14

*Glaciozyma watsonii* 1 0

*Holtermanniella festucosa* 0 1

*Leucosporidium fragarium* 0 4

*Mrakia arctica* 0 8

*Mrakia gelida* 0 64

*Mrakia hoshinonis* 0 32

*Mrakia robertii* 0 7

*Kriegeriales* sp. 25 0

*Vishniacozyma ellesmerensis* 2 0

*Vishniacozyma tephrensis* 0 1

*Vishniacozyma victoriae* 1 48

---

Total 49 224

---
